# Supplementary material
Source: Springer Nature journal article supplement (https://www.springermedizin.de/resource/supplementary/12913_2010_1354_MOESM1_ESM.pdf/9527946)

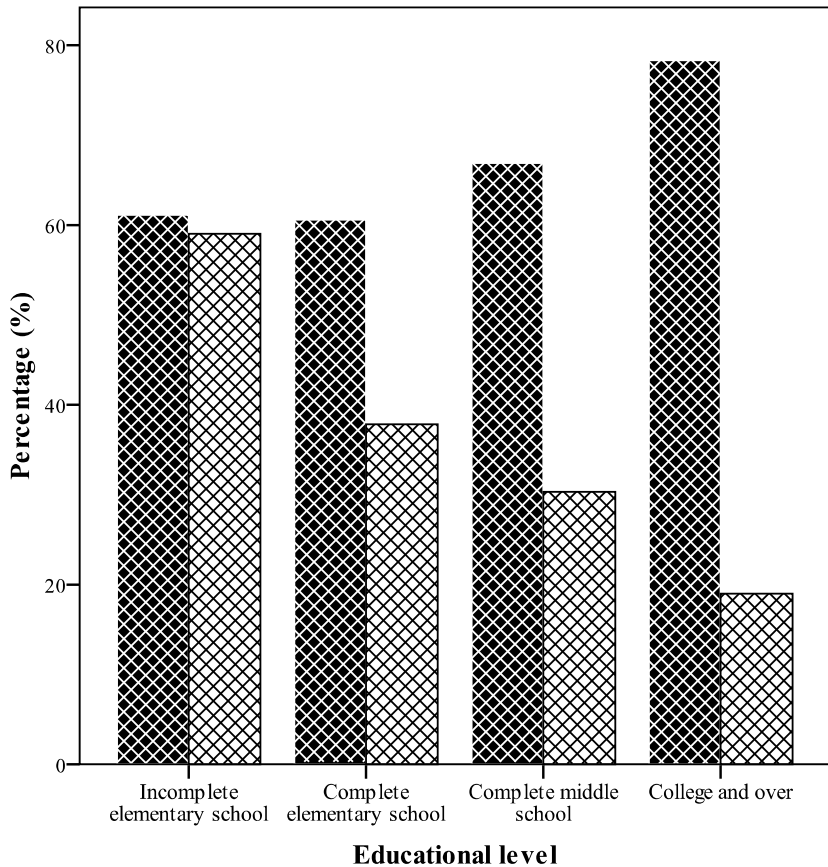

 Outpatient services utilization

 Not good self-rated health

Supplement: MOESM1 [file 9527946]
